# Supplementary material
Source: PubMed Central journal article supplement (PMC9879811)
Supplement: 15010_2022_1844_MOESM1_ESM.pdf [file 15010_2022_1844_MOESM1_ESM.pdf]

## **Analysis of seven SARS-CoV-2 rapid antigen tests in detecting omicron (B.1.1.529) versus delta (B.1.617.2) using cell culture supernatants and clinical specimens**

Sabrina Jungnick<sup>1,2</sup>, Bernhard Hobmaier<sup>1,2</sup>, Natali Paravinja<sup>1,2</sup>, Lena Mautner<sup>3</sup>, Mona Hoyos<sup>3</sup>, Regina Konrad<sup>2</sup>, Maren Haase<sup>3</sup>, Armin Baiker<sup>3</sup>, Ute Eberle<sup>2</sup>, Magdalena Bichler<sup>2</sup>, Bianca Treis<sup>2</sup>, Mercy Okeyo<sup>2</sup>, Barbara Streibl<sup>2</sup>, Clara Wimmer<sup>2</sup>, Sabrina Hepner<sup>2</sup>, Annika Sprenger<sup>2</sup>, Carola Berger<sup>2</sup>, Laura Weise<sup>2</sup>, Alexandra Dangel<sup>2</sup>, Siegfried Ippisch<sup>6</sup>, Walter Jonas<sup>5</sup>, Manfred Wildner<sup>4,5</sup>, Bernhard Liebl<sup>4,5</sup>, Nikolaus Ackermann<sup>2</sup>, Andreas Sing<sup>2,4</sup>, Volker Fingerle<sup>2</sup>, the Bavarian SARS-CoV-2-Public Health Laboratory Team<sup>2,7</sup>

1. These authors contributed equally to this work
2. Public Health Microbiology Unit, Bavarian Health and Food Safety Authority, Oberschleißheim, Germany
3. Unit of molecular biologic analytics and biogenetics, Bavarian Health and Food Safety Authority, Oberschleißheim, Germany
4. Ludwig Maximilian University, Munich, Germany
5. Bavarian State Institute of Health, Oberschleißheim, Germany
6. Bavarian Pandemic Warehouse, Bavarian Health and Food Safety Authority, Oberschleißheim, Germany
7. Members of the Bavarian SARS-CoV-2-Public Health Laboratory Team are listed in acknowledgement

**Correspondence:** Volker Fingerle ([volker.fingerle@lgl.bayern.de](mailto:volker.fingerle@lgl.bayern.de))

### **SUPPLEMENTARY INFORMATION**

#### **SUPPLEMENTARY TABLE** Individual results and background information of clinical omicron and delta samples

Test results are described as negative (0) or as various degrees of positive, depending on the strength of visibility of the test band: (1) very faint, (2) weaker than control band, (3) equally strong or stronger than control band. \* confirmed bei WGS, except no. 24 (due to low virus concentration WGS not successful, confirmed by variant specific RT-qPCR). N/A not available. Negative controls no. 52-54.

| Sample number | Result (replicate 1/ replicate 2) |         |          |         |        |         | Background Information |          |               |                     |
|---------------|-----------------------------------|---------|----------|---------|--------|---------|------------------------|----------|---------------|---------------------|
|               | Test I                            | Test II | Test III | Test IV | Test V | Test VI | E-gene Ct value        | Medium   | Sampling date | Variant of Concern* |
| 1             | 3/3                               | 3/3     | 3/3      | 3/3     | 2/2    | 2/2     | 15.38                  | Virocult | 21.12.2021    | delta               |
| 2             | 2/2                               | 2/2     | 3/3      | 2/2     | 2/2    | 2/2     | 16.87                  | NaCl     | 24.12.2021    | delta               |
| 3             | 3/3                               | 3/3     | 3/3      | 3/3     | 2/2    | 2/2     | 17.14                  | NaCl     | 20.12.2021    | delta               |
| 4             | 2/2                               | 2/2     | 3/3      | 2/2     | 2/2    | 2/2     | 17.80                  | Virocult | 22.12.2021    | delta               |
| 5             | 3/3                               | 3/3     | 3/3      | 2/2     | 0/0    | 2/2     | 18.80                  | NaCl     | 22.12.2021    | delta               |
| 6             | 2/2                               | 2/2     | 2/2      | 2/2     | 2/1    | 1/0     | 18.95                  | NaCl     | 22.12.2021    | delta               |
| 7             | 2/2                               | 2/2     | 2/2      | 0/0     | 2/2    | 1/1     | 19.01                  | Virocult | 22.12.2021    | delta               |
| 8             | 2/2                               | 2/2     | 3/3      | 2/2     | 2/2    | 2/2     | 19.57                  | NaCl     | 22.12.2021    | delta               |
| 9             | 2/2                               | 2/2     | 2/2      | 2/2     | 1/1    | 0/0     | 19.96                  | Virocult | 23.12.2021    | delta               |
| 10            | 1/1                               | 2/2     | 2/2      | 2/2     | 1/1    | 0/0     | 20.27                  | Virocult | 22.12.2021    | delta               |
| 11            | 2/2                               | 3/3     | 3/3      | 2/2     | 3/3    | 2/2     | 20.41                  | Virocult | 22.12.2021    | delta               |
| 12            | 2/2                               | 2/2     | 2/2      | 2/2     | 1/0    | 2/2     | 21.07                  | Virocult | 13.12.2021    | delta               |
| 13            | 2/2                               | 2/2     | 2/2      | 2/2     | 1/1    | 2/2     | 21.68                  | NaCl     | 17.12.2021    | delta               |
| 14            | 0/0                               | 0/0     | 0/0      | 0/0     | 1/0    | 0/0     | 21.88                  | Virocult | 13.12.2021    | delta               |
| 15            | 2/2                               | 2/2     | 2/2      | 1/1     | 1/1    | 0/0     | 22.08                  | Virocult | 17.12.2021    | delta               |
| 16            | 0/0                               | 0/0     | 1/1      | 0/0     | 0/0    | 0/0     | 23.22                  | Virocult | 14.12.2021    | delta               |
| 17            | 0/0                               | 0/0     | 0/0      | 0/0     | 0/0    | 0/0     | 23.73                  | Virocult | 20.12.2021    | delta               |
| 18            | 0/0                               | 0/0     | 1/1      | 0/0     | 0/0    | 0/0     | 24.20                  | Virocult | 16.12.2021    | delta               |
| 19            | 0/0                               | 0/0     | 0/0      | 0/0     | 0/0    | 0/0     | 24.52                  | Virocult | 22.12.2021    | delta               |
| 20            | 1/1                               | 0/0     | 1/1      | 2/2     | 0/0    | 0/0     | 25.20                  | NaCl     | 20.12.2021    | delta               |
| 21            | 0/0                               | 0/0     | 0/0      | 0/0     | 0/0    | 0/0     | 26.00                  | Virocult | 17.12.2021    | delta               |
| 22            | 0/0                               | 0/0     | 0/0      | 0/0     | 0/0    | 0/0     | 28.01                  | Virocult | 17.12.2021    | delta               |
| 23            | 0/0                               | 0/0     | 0/0      | 0/0     | 0/0    | 0/0     | 29.17                  | Virocult | 23.12.2021    | delta               |
| 24            | 0/0                               | 0/0     | 0/0      | 0/0     | 0/0    | 0/0     | 35.53                  | Virocult | 21.12.2021    | delta               |
| 25            | 3/3                               | 3/3     | 3/3      | 3/3     | 3/3    | 3/3     | 15.50                  | Virocult | 22.12.2021    | omicron             |
| 26            | 3/3                               | 3/3     | 3/3      | 3/3     | 2/2    | 2/2     | 18.00                  | NaCl     | 23.12.2021    | omicron             |
| 27            | 3/3                               | 2/2     | 3/3      | 3/3     | 2/2    | 2/2     | 18.58                  | Virocult | 21.12.2021    | omicron             |
| 28            | 2/2                               | 2/2     | 3/3      | 2/2     | 2/2    | 2/2     | 18.96                  | Virocult | 21.12.2021    | omicron             |
| 29            | 2/2                               | 2/2     | 2/2      | 2/2     | 2/2    | 0/1     | 19.48                  | Virocult | 23.12.2021    | omicron             |
| 30            | 2/2                               | 0/0     | 3/3      | 2/2     | 2/2    | 1/1     | 19.59                  | NaCl     | 23.12.2021    | omicron             |
| 31            | 1/1                               | 0/0     | 2/2      | 0/0     | 0/0    | 0/0     | 20.14                  | Virocult | 23.12.2021    | omicron             |
| 32            | 2/2                               | 2/2     | 2/2      | 2/2     | 2/2    | 2/2     | 20.86                  | NaCl     | 23.12.2021    | omicron             |
| 33            | 2/2                               | 2/2     | 3/3      | 2/2     | 2/2    | 2/2     | 21.09                  | Virocult | 16.12.2021    | omicron             |
| 34            | 2/2                               | 2/2     | 2/2      | 2/2     | 1/1    | 0/0     | 21.21                  | NaCl     | 23.12.2021    | omicron             |

|    |     |     |     |     |     |     |       |          |            |          |
|----|-----|-----|-----|-----|-----|-----|-------|----------|------------|----------|
| 35 | 2/2 | 2/2 | 2/2 | 2/2 | 1/1 | 0/1 | 21.30 | Virocult | 16.12.2021 | omicron  |
| 36 | 1/1 | 2/2 | 2/2 | 2/2 | 0/0 | 0/0 | 21.45 | Virocult | 16.12.2021 | omicron  |
| 37 | 0/0 | 0/0 | 1/1 | 0/0 | 1/1 | 0/0 | 22.09 | Virocult | 20.12.2021 | omicron  |
| 38 | 1/1 | 2/2 | 2/2 | 1/1 | 2/2 | 0/0 | 22.19 | NaCl     | 23.12.2021 | omicron  |
| 39 | 1/0 | 1/1 | 2/2 | 0/0 | 2/2 | 0/0 | 22.38 | Virocult | 20.12.2021 | omicron  |
| 40 | 2/2 | 2/2 | 2/2 | 2/2 | 2/0 | 1/1 | 22.45 | NaCl     | 14.12.2021 | omicron  |
| 41 | 1/1 | 2/2 | 2/2 | 2/2 | 2/2 | 0/0 | 23.09 | Virocult | 16.12.2021 | omicron  |
| 42 | 1/1 | 0/0 | 2/2 | 2/2 | 0/0 | 0/0 | 23.15 | Virocult | 20.12.2021 | omicron  |
| 43 | 2/2 | 2/2 | 2/2 | 1/1 | 2/2 | 1/0 | 23.48 | Virocult | 21.12.2021 | omicron  |
| 44 | 0/0 | 1/1 | 2/2 | 0/0 | 0/0 | 0/0 | 23.56 | Virocult | 22.12.2021 | omicron  |
| 45 | 0/0 | 1/1 | 1/1 | 0/0 | 0/0 | 0/0 | 23.83 | Virocult | 13.12.2021 | omicron  |
| 46 | 2/2 | 1/1 | 2/2 | 2/2 | 1/1 | 0/0 | 24.33 | Virocult | 16.12.2021 | omicron  |
| 47 | 0/0 | 0/0 | 0/0 | 0/0 | 2/2 | 0/0 | 26.42 | NaCl     | 23.12.2021 | omicron  |
| 48 | 0/0 | 0/0 | 0/0 | 0/0 | 0/0 | 0/0 | 26.86 | Virocult | 20.12.2021 | omicron  |
| 49 | 0/0 | 0/0 | 0/0 | 0/0 | 0/0 | 0/0 | 27.99 | Virocult | 14.12.2021 | omicron  |
| 50 | 0/0 | 0/0 | 0/0 | 0/0 | 0/0 | 0/0 | 28.07 | Virocult | 20.12.2021 | omicron  |
| 51 | 0/0 | 0/0 | 0/0 | 0/0 | 0/0 | 0/0 | 31.36 | Virocult | 22.12.2021 | omicron  |
| 52 | 0/0 | 0/0 | 0/0 | 0/0 | 0/0 | 0/0 | N/A   | Virocult | 27.12.2021 | negative |
| 53 | 0/0 | 0/0 | 0/0 | 0/0 | 1/1 | 0/0 | N/A   | NaCl     | 13.12.2021 | negative |
| 54 | 0/0 | 0/0 | 0/0 | 0/0 | 0/0 | 0/0 | N/A   | NaCl     | 13.12.2021 | negative |
